# Supplementary material for: Dual fluorescent hollow silica nanofibers for in situ pH monitoring using an optical fiber
Source: Royal Society of Chemistry journal article supplement (doi:10.1039/d2na00943a), 2023-01-01
Supplement: d2na00943a4.pdf [file d2na00943a4.pdf]

## **Dual fluorescence hollow silica nanofibers for *in situ* pH monitoring using an optical fiber**

*Junhu Zhou*<sup>‡</sup>, *Yundong Ren*<sup>‡</sup>, *Yuan Nie*, *Congran Jin*, *Jiyeon Park*, *John X.J. Zhang*\*

Thayer School of Engineering, Dartmouth College, Hanover, NH 03755, USA

\*Corresponding author: [John.Zhang@Dartmouth.edu](mailto:John.Zhang@Dartmouth.edu)

Tel: (603) 646-8787. Fax: (603) 646-9024

<sup>‡</sup>These authors have contributed equally to this work.

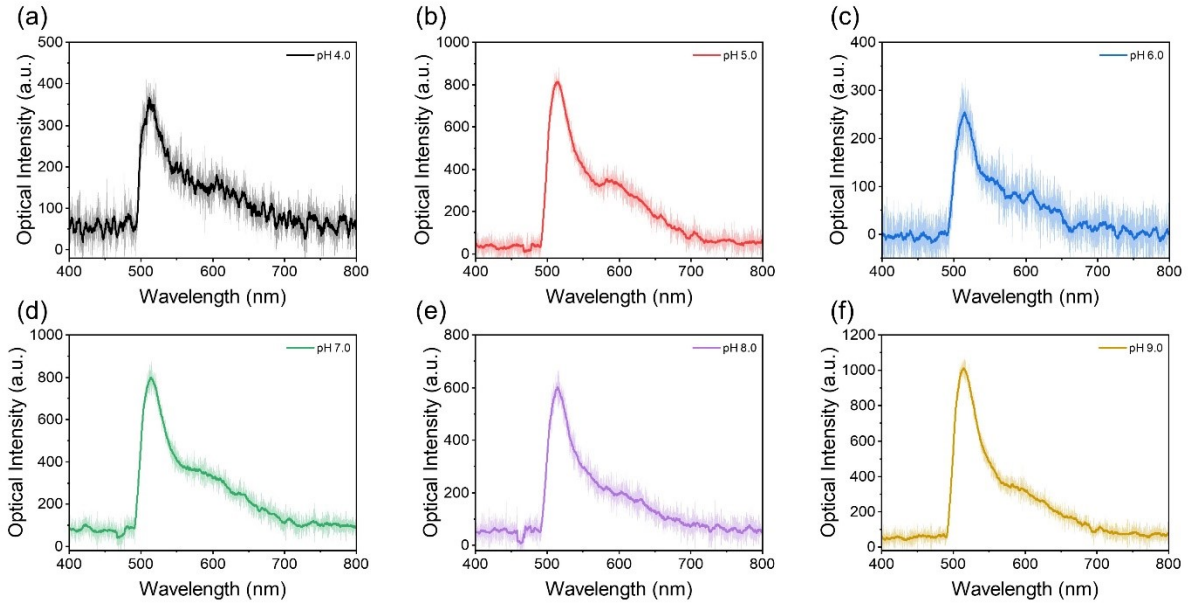

**Fig. S1** The pH response of the dual fluorescence hSNFs. The individual optical spectra measured in colorless pH 4.0 (a), pH 5.0 (b), pH 6.0 (c), pH 7.0 (d), pH 8.0 (e), pH 9.0 (f) buffer solutions with error bars (the shaded area).

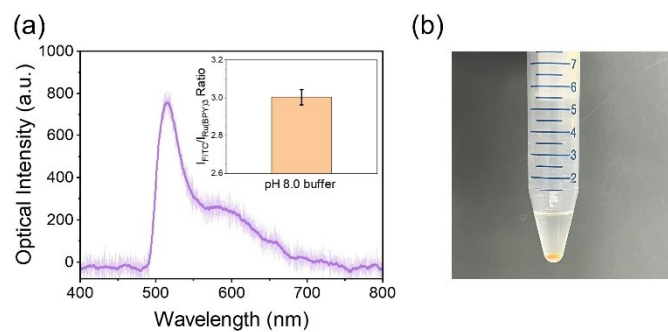

**Fig. S2** Effect of storage on stability of the dual fluorescence hSNFs. (a) The optical spectra of the dual fluorescence hSNFs in pH 8.0 buffer solution after storage in dark for one month. The inserted figure represents the  $I_{FITC}/I_{Ru(BPY)_3}$  ratio. (b) The image of the dual fluorescence hSNFs in ethanol after storage in dark for one month.

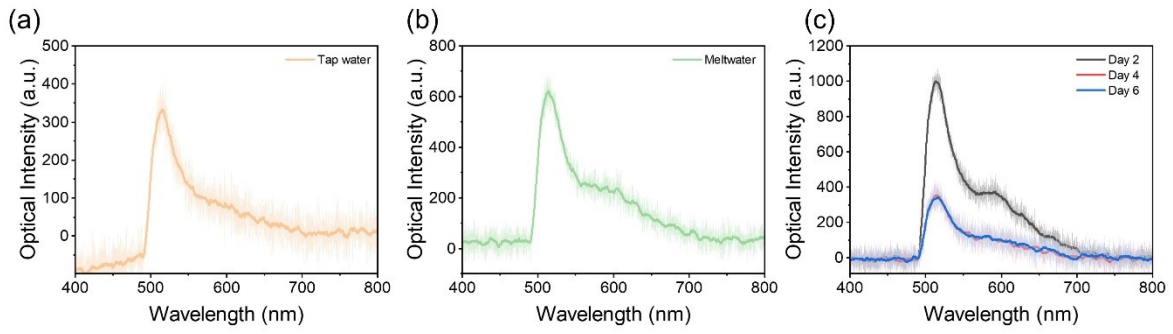

**Fig. S3** The optical spectra of real samples with error bars (the shaded area). (a) The optical spectra of tap water. (b) The optical spectra of meltwater. (c) The optical spectra of cell culture media at different days.

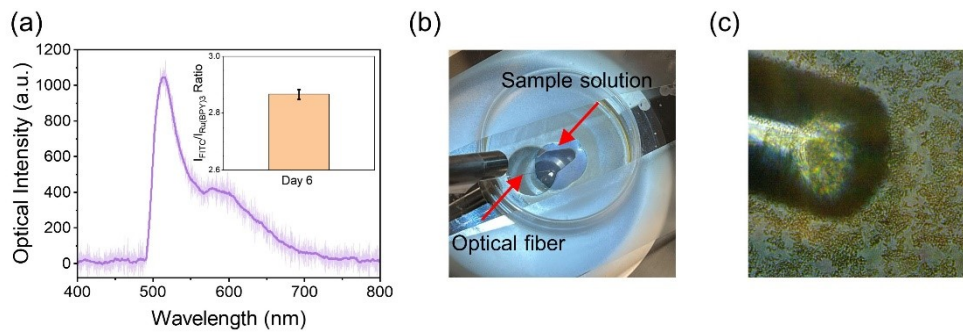

**Fig. S4** Tiny sample size testing. (a) The optical spectra of 50  $\mu\text{L}$  hiPSC-CMs culture media at day 6. The inserted figure represents the  $I_{FITC}/I_{Ru(BPY)_3}$  ratio. (b) The image of the experimental setup. (c) The microscope image of the tilted optical fiber tip positioned above the hSNFs in the 50  $\mu\text{L}$  sample solution.

Table S1. Major fluorescent pH sensor developed in recent years

| Reference        | Tsou et al. <sup>1</sup> | Chen et al. <sup>2</sup> | Song et al. <sup>3</sup>    | Fulaz et al. <sup>4</sup> | Tsou et al. <sup>5</sup>    | Hu et al. <sup>6</sup>  | Shangguan et al. <sup>7</sup> | Yuan et al. <sup>8</sup> | Gotor et al. <sup>9</sup>    | <input type="checkbox"/> This work |
|------------------|--------------------------|--------------------------|-----------------------------|---------------------------|-----------------------------|-------------------------|-------------------------------|--------------------------|------------------------------|------------------------------------|
| Year             | 2013                     | 2015                     | 2017                        | 2019                      | 2014                        | 2015                    | 2016                          | 2020                     | 2017                         | 2022                               |
| Device           | Confocal microscopy      |                          | Fluorescence microscope     |                           | Fluorometer                 |                         |                               |                          | Smartphone                   | Fiber-optic spectrometer           |
| System           | 2 dyes in nanoparticles  | Small molecular          | Carbon dots                 | 2 dyes in nanoparticles   | 2 dyes in nanoparticles     | 2 dyes in nanoparticles | Carbon dots                   | Small molecular          | 13 dyes on strip             | 2 dyes in nanofibers               |
| Portability      | Low                      | Low                      | Low                         | Low                       | Low                         | Low                     | Low                           | Low                      | High                         | High                               |
| Excitation light | 3                        | 2                        | 1                           | 2                         | 2                           | 2                       | 1                             | 1                        | 11                           | 1                                  |
| pH range         | 4.5-8.5                  | 6.18-8.38                | 1.5-5.0                     | 3.5-8.5                   | 3.2-9.0                     | 3.8-7.4                 | 5.2-8.8                       | 3.0-5.5                  | 0-14                         | 4.0-9.0                            |
| Linearity        | Fair                     | Fair                     | Good                        | Fair                      | Fair                        | Fair                    | Good                          | Good                     | Good                         | Good                               |
| Reversibility    | n/a                      | Yes                      | Yes                         | Yes                       | n/a                         | n/a                     | Yes                           | Yes                      | n/a                          | Yes                                |
| Immobilization   | No                       | No                       | <input type="checkbox"/> No | No                        | <input type="checkbox"/> No | No                      | No                            | No                       | <input type="checkbox"/> Yes | <input type="checkbox"/> Yes       |

## Reference

- 1 C.-J. Tsou, C. Chu, Y. Hung and C.-Y. Mou, *J. Mater. Chem. B*, 2013, **1**, 5557.
- 2 Y. Chen, C. Zhu, J. Cen, Y. Bai, W. He and Z. Guo, *Chem. Sci.*, 2015, **6**, 3187–3194.
- 3 W. Song, W. Duan, Y. Liu, Z. Ye, Y. Chen, H. Chen, S. Qi, J. Wu, D. Liu, L. Xiao, C. Ren and X. Chen, *Anal. Chem.*, 2017, **89**, 13626–13633.
- 4 S. Fulaz, D. Hiebner, C. H. N. Barros, H. Devlin, S. Vitale, L. Quinn and E. Casey, *ACS Appl. Mater. Interfaces*, 2019, **11**, 32679–32688.
- 5 C.-J. Tsou, Y. Hung and C.-Y. Mou, *Microporous Mesoporous Mater.*, 2014, **190**, 181–188.
- 6 S. Hu, L. Sun, M. Liu, H. Zhu, H. Guo, H. Sun and H. Sun, *New J. Chem.*, 2015, **39**, 4568–4574.
- 7 J. Shangguan, D. He, X. He, K. Wang, F. Xu, J. Liu, J. Tang, X. Yang and J. Huang, *Anal. Chem.*, 2016, **88**, 7837–7843.

8 X. Yuan, T. Zhang, J. Yan, X. Chen, L. Wang, X. Liu, K. Zheng and N. Zhang, *Dye.*

*Pigment.*, 2020, **177**, 108318.

9 R. Gotor, P. Ashokkumar, M. Hecht, K. Keil and K. Rurack, *Anal. Chem.*, 2017, **89**,

8437–8444.
